# Supplementary material for: Genotoxic stress in constitutive trisomies induces autophagy and the innate immune response via the cGAS-STING pathway
Source: PubMed Central journal article supplement (PMC8253785; doi:10.1038/s42003-021-02278-9), 2021-07-02
Supplement: 42003_2021_2278_MOESM1_ESM.pdf [file 42003_2021_2278_MOESM1_ESM.pdf]

## Supplementary Information

### Genotoxic stress in constitutive trisomies induces autophagy and the innate immune response via the cGAS-STING pathway

Maria Krivega<sup>1</sup>, Clara M. Stiefel<sup>1</sup>, Sahar Karbassi<sup>1</sup>, Line L. Andersen<sup>3</sup>, Narendra K. Chunduri<sup>1</sup>, Neysan Donnelly<sup>2</sup>, Andreas Pichlmair<sup>3,4</sup>, Zuzana Storchova<sup>1,\*</sup>

**1** Molecular Genetics, University of Kaiserslautern, Paul-Ehrlich Strasse 24, 67663 Kaiserslautern, Germany

**2** Max Planck Institute of Biochemistry, Am Klopferspitz 18, 82152 Martinsried, Germany

**3** Institute of Virology, TU Munich, Schneckenburgerstrasse 8, 81675 München, Germany

**4** German Center for Infection Research (DZIF), Munich partner site, Germany

**Corresponding author: Zuzana Storchova, [storchova@bio.uni-kl.de](mailto:storchova@bio.uni-kl.de), ORCID: 0000-0003-2376-7047**

Supplementary figure 1: Characterisation of autophagy in trisomic cells.

Supplementary figure 2: Regulation of autophagy in trisomic cells.

Supplementary figure 3: dsDNA presence in the cytoplasm of trisomic cells.

Supplementary figure 4: dsDNA accumulation in cytoplasm upon autophagy inhibition in trisomic cells.

Supplementary figure 5: Activation of the innate immune pathway in trisomic cells.

Supplementary figure 6: Transcriptional activation of the innate immune pathway in trisomic cells

Supplementary figure 7: Activation of the innate immune response, but not autophagy, depends on TBK1 in constitutive trisomic cells.

Supplementary figure 8: Innate immune response in trisomic human primary fibroblast.

Supplementary figure 9: Autophagy activity in primary human fibroblasts with trisomy.

Supplementary table 1: Cell lines used in the study

Supplementary table 2: List of used antibodies

Supplementary table 3: Primers used for qRT-PCR

Supplementary table 4 Summary of the statistical evaluation for each figure.

Supplementary Data 1: Expression of TFEB-dependent factors in aneuploid cells

Supplementary Data 2: Expression of IRF3 and NFkB-dependent factors in aneuploid cells

Supplementary Data 3: Expression of NFkB targets evaluated by quantitative rtPCR

Supplementary Data 4: Expression of inflammation markers in aneuploid cells

Supplementary Data 5: Source data for all main figures

Supplementary Data 6: Source data for all supplementary figures

Supplementary table 1. Cell lines used in the study.

| <b>HCT116-derived cell lines</b>           |                |             |                           |                           |                                        |
|--------------------------------------------|----------------|-------------|---------------------------|---------------------------|----------------------------------------|
|                                            | <b>Name</b>    | <b>Chr.</b> | <b>H2B-GFP</b>            | <b>Type of aneuploidy</b> | <b>Comments</b>                        |
|                                            | HCT116         | -           | -                         |                           | AATC                                   |
|                                            | HCT116 H2B-GFP | -           | +                         |                           | Kuffer et al, 2013                     |
| 1                                          | Htr3_11        | 3           | +                         | Trisomy                   | Passerini et al., 2016                 |
| 2                                          | Hte5_1         | 5           | -                         | Tetrasomy                 | From Minoru Koi (Stingele et al, 2012) |
| 3                                          | Htr5_6         | 5           | +                         | Trisomy                   | Stingele et al, 2012                   |
| 4                                          | Hte5_4         | 5           | +                         | Tetrasomy                 | Stingele et al, 2012                   |
| 5                                          | Htr8_5         | 8           | +                         | Trisomy                   | Donnelly et al, 2014                   |
| 6                                          | Htr13_2        | 13          | -                         | Trisomy                   | Domingues et al, 2017                  |
| 7                                          | Htr18_1        | 18          | -                         | Trisomy                   | Domingues et al, 2017                  |
| 8                                          | Htr21_3        | 21          | -                         | Trisomy                   | Domingues et al, 2017                  |
| <b>RPE1-derived cell lines</b>             |                |             |                           |                           |                                        |
|                                            | <b>Name</b>    | <b>Chr.</b> | <b>H2B-GFP</b>            | <b>Type of aneuploidy</b> | <b>Comments</b>                        |
|                                            | RPE1           | -           | -                         |                           | Kind gift from Steven Taylor           |
|                                            | RPE1 H2B-GFP   | -           | +                         |                           | Kind gift from Steven Taylor           |
| 1                                          | Rtr3_1         | 3           | -                         | Trisomy                   | Stingele et al, 2012                   |
| 2                                          | Rtr5,12_3      | 5, 12       | +                         | Trisomy                   | Stienegele et al, 2012                 |
| 3                                          | Rtr7_1         | 7           | +                         | Trisomy                   | Duerrbaum et al, 2018                  |
| 4                                          | Rtr8_1         | 8           | -                         | Trisomy                   | Kneissig et al, 2019                   |
| 5                                          | Rtr21_2        | 21          | +                         | Trisomy                   | Stingele et al, 2012                   |
| <b>Human primary embryonic fibroblasts</b> |                |             |                           |                           |                                        |
|                                            | <b>Name</b>    | <b>Chr.</b> | <b>Type of aneuploidy</b> |                           | <b>Reference number</b>                |
|                                            | Diploid ctrl_A |             |                           |                           | AG04392                                |
|                                            | Diploid ctrl_B |             |                           |                           | AG21708                                |
| 1                                          | Tr.8           | 8           | Trisomy                   |                           | GM00496                                |
| 2                                          | Tr.15          | 15          | Trisomy                   |                           | GM07189                                |
| 3                                          | Tr.18_A        | 18          | Trisomy                   |                           | GM03538                                |
| 4                                          | Tr.18_B        | 18          | Trisomy                   |                           | GM00734                                |
| 5                                          | Tr.21_A        | 21          | Trisomy                   |                           | GM02058                                |
| 6                                          | Tr.21_B        | 21          | Trisomy                   |                           | GM04616                                |

Supplementary table 2 List of used antibodies

| Antibody                      | Conditions used |              | Reference | Company                   |
|-------------------------------|-----------------|--------------|-----------|---------------------------|
|                               | WB              | IF           |           |                           |
| AKT                           | 1:1000          | NA           | 9272      | Santa Cruz Biotechnology  |
| p-Akt (Ser473)                | 1:1000          | NA           | 4060      | Cell Signaling Technology |
| AMPK $\alpha$ (D5A2)          | 1:1000          | NA           | 5831      | Cell Signaling Technology |
| p-AMPK $\alpha$ -Thr172       | 1:1000          | NA           | 2531      | Cell Signaling Technology |
| $\alpha$ -actinin (H-2)       | 1:1000          | NA           | 17829     | Santa Cruz Biotechnology  |
| $\beta$ -actin-HRP            | 1:2500          | NA           | sc-47778  | Santa Cruz Biotechnology  |
| cGAS (D1D3G)                  | 1:1000          | 1:100        | 15102     | Cell Signaling Technology |
| dsDNA                         | NA              | 1:50         | 58749     | Santa Cruz Biotechnology  |
| GAPDH                         | 1:1000          | NA           | 14C10     | Cell Signaling Technology |
| Histone H3                    | NA              | 1:100        | 9715      | Cell Signaling Technology |
| HRP Mouse                     | 1:5000          | NA           | HAF007    | R&D Systems               |
| HRP Rabbit                    | 1:5000          | NA           | HAF008    | R&D Systems               |
| H3                            | 1:500           | NA           | ab12079   | Abcam                     |
| I $\kappa$ B $\alpha$ (L35A5) | 1:1000          | NA           | 48144S    | Cell Signaling Technology |
| IRF3 (D83B9)                  | NA              | 1:50         | 4302      | Cell Signaling Technology |
| LAMP2                         | NA              | 2 $\mu$ g/mL | ab13534   | Abcam                     |
| LC3B (EPR18709)               | 1:3000          | 2 $\mu$ g/mL | 192890    | Abcam                     |
| mTOR (EPR390(N))              | 1:500           | NA           | ab134903  | Abcam                     |
| NRF2 (D1Z9C) XP               | 1:1000          | 1:100        | 12721     | Cell Signaling Technology |
| P70S6K                        | 1:1000          | NA           | 2708      | Cell Signaling Technology |
| p-P70S6 (Thr389)              | 1:500           | NA           | 9205      | Cell Signaling Technology |
| STAT1                         | NA              | 1:100        | N9172     | Cell Signaling Technology |
| STING (D2P2F)                 | 1:1000          | 1:50         | 13647S    | Cell Signaling Technology |
| p-STING (S366) (D7C3S)        | 1:1000          | NA           | 19781S    | Cell Signaling Technology |
| TBK1 (108A429)                | 1 $\mu$ g/mL    | NA           | Ab12116   | Abcam                     |
| p-TBK1 (Ser172)( D52C2)       | 1:500           | NA           | 54834     | Cell Signaling Technology |
| TFAM                          | NA              | 2 $\mu$ g/mL | ab176558  | Abcam                     |
| TFE3                          | NA              | 2 $\mu$ g/mL | HPA023881 | Sigma (Atlas antibodies)  |
| TFEB                          | NA              | 5 $\mu$ g/mL | MAB9170   | R&D systems               |
| p-ULK1 (Ser757) (D7O6U)       | 1:1000          | NA           | 14202     | Cell Signaling            |

Supplementary table 3. Primers used for qRT-PCR

| Target gene | Primer sequence (5' → 3')         | Reference                 |
|-------------|-----------------------------------|---------------------------|
| hIFIT1 F    | TACCTGGACAAGGTGGAGAA              | Rubina Baglio et al, 2016 |
| hIFIT1 R    | GTGAGGACATGTTGGCTAGA              | Rubina Baglio et al, 2016 |
| hIFIT3 F    | CTTACGGCAAGCTGAAGAGT              | Rubina Baglio et al, 2016 |
| hIFIT3 R    | AATTGCCAGTCCAGAGGAGA              | Rubina Baglio et al, 2016 |
| hOAS3 F     | CCCTGGTCTGAGACTCACGTTT            | Ma et al, 2008            |
| hOAS3 R     | GACTTGTGGCTTGGGTTTGAC             | Ma et al, 2008            |
| hRPL27 F    | ATCGCCAAGAGATCAAAGATAA            | Donnelly et al, 2014      |
| hRPL27 R    | TCTGAAGACATCCTTATTGACG            | Donnelly et al, 2014      |
| SPIKE       | Proprietary to TATAA Biocenter AB |                           |
| LC3 F       | GAGAAGCAGCTTCCTGTTCTGG            | Jiang et al., 2011        |
| LC3 R       | GTGTCCGTTCAACCAACAGGAAG           | Jiang et al., 2011        |
| SQSTM1 F    | ATTGAGTCCCTCTCCCAGAT              | Park et al., 2019         |
| SQSTM1 R    | CGCTCCGATGTCAT AGTTCTT            | Park et al., 2019         |

Supplementary table 4 Summary of the statistical evaluation for each figure.

| Figure 1                                              |         |                 |         |         |
|-------------------------------------------------------|---------|-----------------|---------|---------|
| ANOVA, p values                                       |         | t test, p value |         |         |
| Fig. 1f IF nuclear TFEB                               |         |                 |         |         |
| HCT116 vs Hte5_1,<br>Htr13_2, Htr18_1,<br>Htr21_3     | <0.0001 | HCT116<br>vs    | Hte5_1  | <0.0001 |
|                                                       |         |                 | H13_2   | 0.0004  |
|                                                       |         |                 | Htr18_3 | 0.0003  |
|                                                       |         |                 | Htr21_1 | 0.0001  |
| RPE1 vs Rtr3_1,<br>Rtr5_3, Rtr8_1,<br>Rtr7_1, Rtr21_2 | <0.0001 | RPE1 vs         | Rtr3_1  | <0.0001 |
|                                                       |         |                 | Rtr5_3  | <0.0001 |
|                                                       |         |                 | Rtr8_1  | <0.0001 |
|                                                       |         |                 | Rtr7_1  | 0.0101  |
| Rtr21_2                                               | <0.0001 |                 |         |         |
| Fig. 1h IF LC3+puncta                                 |         |                 |         |         |
| HCT116 vs Hte5_1,<br>Htr18_1, Htr21_3                 | <0.0001 | HCT116<br>vs    | Hte5_1  | <0.0001 |
|                                                       |         |                 | Htr18_3 | <0.0001 |
|                                                       |         |                 | Htr21_1 | <0.0001 |
| RPE1 vs Rtr3_1,<br>Rtr8_1                             | <0.0001 | RPE1 vs         | Rtr3_1  | <0.0001 |
|                                                       |         |                 | Rtr8_1  | <0.0001 |
| Fig. 1i IF LAMP2+ puncta                              |         |                 |         |         |
| HCT116 vs Hte5_1,<br>Htr18_1, Htr21_3                 | <0.0001 | HCT116<br>vs    | Hte5_1  | <0.0001 |
|                                                       |         |                 | Htr18_3 | <0.0001 |
|                                                       |         |                 | Htr21_1 | <0.0001 |
| RPE1 vs Rtr3_1,<br>Rtr8_1                             | <0.0001 | RPE1 vs         | Rtr3_1  | 0.0088  |
|                                                       |         |                 | Rtr8_1  | <0.0001 |

| Figure 2                              |         |                 |         |         |
|---------------------------------------|---------|-----------------|---------|---------|
| ANOVA, p values                       |         | t test, p value |         |         |
| Fig. 2d IF dsDNA and H3 + puncta, %   |         |                 |         |         |
| HCT116 vs Hte5_1,<br>Htr18_1, Htr21_3 | <0.0001 | HCT116<br>vs    | Hte5_1  | <0.0001 |
|                                       |         |                 | Htr18_3 | <0.0001 |
|                                       |         |                 | Htr21_1 | <0.0001 |
| RPE1 vs Rtr3_1,<br>Rtr8_1             | <0.0001 | RPE1 vs         | Rtr3_1  | <0.0001 |
|                                       |         |                 | Rtr8_1  | <0.0001 |
| Fig. 2 IF dsDNA and TFAM + puncta, %  |         |                 |         |         |
| HCT116 vs Hte5_1,<br>Htr18_1, Htr21_3 | <0.0001 | HCT116<br>vs    | Hte5_1  | <0.0001 |
|                                       |         |                 | Htr18_3 | 0.0034  |
|                                       |         |                 | Htr21_1 | 0.0006  |
| RPE1 vs Rtr3_1,<br>Rtr8_1             | 0.0004  | RPE1 vs         | Rtr3_1  | <0.0001 |
|                                       |         |                 | Rtr8_1  | 0.0002  |

| Figure 3                                                 |         |                 |             |         |
|----------------------------------------------------------|---------|-----------------|-------------|---------|
| ANOVA, p values                                          |         | t test, p value |             |         |
| Fig. 3b WB TBK1                                          |         |                 |             |         |
| HCT116 vs Hte5_1,<br>Htr18_1, Htr21_3                    | 0.0252  | HCT116<br>vs    | Hte5_1      | 0.0066  |
|                                                          |         |                 | Htr18_3     | 0.0190  |
|                                                          |         |                 | Htr21_1     | 0.0329  |
| RPE1 vs Rtr3_1,<br>Rtr8_1                                | 0.0102  | RPE1 vs         | Rtr3_1      | 0.0295  |
|                                                          |         |                 | Rtr8_1      | NS      |
| Fig. 3c WB p-TBK1                                        |         |                 |             |         |
| HCT116 vs Hte5_1,<br>Htr18_1, Htr21_3                    | 0.0011  | HCT116<br>vs    | Hte5_1      | 0.0005  |
|                                                          |         |                 | Htr18_3     | 0.0027  |
|                                                          |         |                 | Htr21_1     | 0.0004  |
| RPE1 vs Rtr3_1,<br>Rtr8_1                                | NS      | RPE1 vs         | Rtr3_1      | 0.0283  |
|                                                          |         |                 | Rtr8_1      | 0.0409  |
| Fig. 3d WB STING                                         |         |                 |             |         |
| HCT116 vs Hte5_1,<br>Htr18_1, Htr21_3                    | <0.0001 | HCT116<br>vs    | Hte5_1      | 0.0004  |
|                                                          |         |                 | Htr18_3     | 0.0026  |
|                                                          |         |                 | Htr21_1     | 0.0024  |
| RPE1 vs Rtr3_1,<br>Rtr8_1                                | NS      | RPE1 vs         | Rtr3_1      | NS      |
|                                                          |         |                 | Rtr8_1      | 0.0303  |
| Fig. 3e WB p-STING                                       |         |                 |             |         |
| HCT116 vs Hte5_1,<br>Htr18_1, Htr21_3                    | 0.0022  | HCT116<br>vs    | Hte5_1      | 0.0286  |
|                                                          |         |                 | Htr18_3     | 0.0286  |
|                                                          |         |                 | Htr21_1     | NS      |
| RPE1 vs Rtr3_1,<br>Rtr8_1                                | 0.0254  | RPE1 vs         | Rtr3_1      | 0.0286  |
|                                                          |         |                 | Rtr8_1      | 0.0286  |
| Fig. 3g IF cyt. STING                                    |         |                 |             |         |
| HCT116 vs Hte5_1,<br>Htr18_1, Htr21_3                    | <0.0001 | HCT116<br>vs    | Hte5_1      | <0.0001 |
|                                                          |         |                 | Htr18_3     | 0.0128  |
|                                                          |         |                 | Htr21_1     | 0.0097  |
| RPE1 vs Rtr3_1,<br>Rtr8_1                                | 0.0018  | RPE1 vs         | Rtr3_1      | 0.0039  |
|                                                          |         |                 | Rtr8_1      | 0.0344  |
| Fig. 3j IF IRF3 nucl.                                    |         |                 |             |         |
| HCT116 vs<br>HCT116+AraC,<br>Hte5_1, Htr18_1,<br>Htr21_3 | <0.0001 | HCT116<br>vs    | HCT116+AraC | <0.0001 |
|                                                          |         |                 | Hte5_1      | <0.0001 |
|                                                          |         |                 | Htr18_3     | <0.0001 |
|                                                          |         |                 | Htr21_1     | <0.0001 |
| RPE1 vs RPE1+AraC,<br>Rtr3_1, Rtr8_1                     | <0.0001 | RPE1 vs         | RPE1+AraC   | <0.0001 |
|                                                          |         |                 | Rtr3_1      | <0.0001 |
|                                                          |         |                 | Rtr8_1      | 0.0305  |

| Figure 4                                                 |                           |                 |
|----------------------------------------------------------|---------------------------|-----------------|
|                                                          | Welch's test,<br>p values | t test, p value |
| Fig. 4g, qRT-PCR <i>IFITs</i> , ctrl siRNA vs cGAS siRNA |                           |                 |
| HCT116                                                   | NS                        | NS              |
| HCT116+AraC                                              | 0.0040                    | 0.0200          |
| Hte5_1                                                   | 0.0311                    | 0.0345          |
| Htr18_1                                                  | NS                        | 0.0366          |
| Htr21_3                                                  | NS                        | 0.0498          |
| RPE1                                                     | NS                        | NS              |
| RPE1+AraC                                                | 0.0171                    | 0.0195          |
| Rtr3_1                                                   | NS                        | 0.0500          |
| Rtr8_1                                                   | 0.1226                    | 0.0281          |

| Figure 5                                                |                           |                 |
|---------------------------------------------------------|---------------------------|-----------------|
|                                                         | Welch's test, p<br>values | t test, p value |
| Fig. 5a IF TFEB nucl., ctrl siRNA vs cGAS siRNA         |                           |                 |
| HCT116                                                  | 0.0057                    | 0.0086          |
| HCT116+AraC                                             | 0.0322                    | 0.0286          |
| Hte5_1                                                  | 0.0125                    | 0.0080          |
| Htr18_1                                                 | 0.0012                    | 0.0028          |
| Htr21_3                                                 | 0.0003                    | 0.0003          |
| RPE1                                                    | NS                        | NS              |
| RPE1+AraC                                               | NS                        | 0.0286          |
| Rtr3_1                                                  | 0.0257                    | 0.0286          |
| Rtr8_1                                                  | 0.0390                    | 0.0286          |
| Fig. 5d – cGAS-CRISPR-KO vs CTRL-CRISPR – TFEB nucl. IF |                           |                 |
| Diploid                                                 | NS                        | NS              |
| Trisomic                                                | 0.0044                    | 0.0004          |
| Fig. 5f – STING-CRISPR-KO vs CTRL-CRISPR – TFEB nucl IF |                           |                 |
| Diploid                                                 | NS                        | NS              |
| Trisomic                                                | 0.0318                    | 0.0305          |
| Fig. 5h – cGAS-CRISPR-KO vs CTRL-CRISPR – IRF3 nucl. IF |                           |                 |
| Diploid                                                 | NS                        | NS              |
| Trisomic                                                | 0.0013                    | 0.0009          |

| Figure 6                   |         |                   |     |         |
|----------------------------|---------|-------------------|-----|---------|
| ANOVA, p values            |         | t test, p value   |     |         |
| Fig. 6d IF TFEB nucl.      |         |                   |     |         |
| HCT116 CTRL vs<br>KD1, KD2 | NS      | HCT116<br>CTRL vs | KD1 | NS      |
|                            |         |                   | KD2 | NS      |
| Htr5-6 CTRL vs KD1,<br>KD2 | <0.0001 | Htr5_6<br>vs      | KD1 | <0.0001 |
|                            |         |                   | KD2 | <0.0001 |
| Fig. 6f IF IRF3 nucl.      |         |                   |     |         |
| HCT116 CTRL vs<br>KD1, KD2 | NS      | HCT116<br>CTRL vs | KD1 | NS      |
|                            |         |                   | KD2 | NS      |
| Htr5-6 CTRL vs KD1,<br>KD2 | 0.0016  | Htr5_6<br>vs      | KD1 | 0.0121  |
|                            |         |                   | KD2 | 0.0044  |
| Fig. 6h IF LC3+puncta      |         |                   |     |         |
| HCT116 CTRL vs<br>KD1, KD2 | 0.0168  | HCT116<br>CTRL vs | KD1 | NS      |
|                            |         |                   | KD2 | NS      |
| Htr5-6 CTRL vs KD1,<br>KD2 | <0.0001 | Htr5_6<br>vs      | KD1 | <0.0001 |
|                            |         |                   | KD2 | <0.0001 |
| Fig. 6i IF LAMP2+puncta    |         |                   |     |         |
| HCT116 CTRL vs<br>KD1, KD2 | NS      | HCT116<br>CTRL vs | KD1 | NS      |
|                            |         |                   | KD2 | NS      |
| Htr5-6 CTRL vs KD1,<br>KD2 | <0.0001 | Htr5_6<br>vs      | KD1 | <0.0001 |
|                            |         |                   | KD2 | <0.0001 |



| Figure 7                                                   |         |                 |         |         |
|------------------------------------------------------------|---------|-----------------|---------|---------|
| ANOVA, p values                                            |         | t test, p value |         |         |
| Fig. 7b IF cyt. dsDNA                                      |         |                 |         |         |
| Diploid vs Tr.8, Tr.15, Tr.18_A, Tr.18_B, Tr.21_A, Tr.21_B | 0.0005  | Diploid vs      | Tr.8    | <0.0001 |
|                                                            |         |                 | Tr.15   | 0.0004  |
|                                                            |         |                 | Tr.18_A | 0.0026  |
|                                                            |         |                 | Tr.18_B | 0.0014  |
|                                                            |         |                 | Tr.21_A | 0.0013  |
|                                                            |         |                 | Tr.21_B | <0.0001 |
| Fig. 7d IF cyt. STING                                      |         |                 |         |         |
| Diploid vs Tr.8, Tr.18_A, Tr.18_B, Tr.21_A                 | <0.0001 | Diploid vs      | Tr.8    | 0.0126  |
|                                                            |         |                 | Tr.18_A | 0.0008  |
|                                                            |         |                 | Tr.18_B | 0.0007  |
|                                                            |         |                 | Tr.21_A | 0.0003  |
| Fig. 7f WB TBK1                                            |         |                 |         |         |
| Diploid vs Tr.8, Tr.18_A, Tr.18_B, Tr.21_A                 | NS      | Diploid vs      | Tr.8    | NS      |
|                                                            |         |                 | Tr.18_A | NS      |
|                                                            |         |                 | Tr.18_B | NS      |
|                                                            |         |                 | Tr.21_A | NS      |
| Fig. 7g WB p-TBK1                                          |         |                 |         |         |
| Diploid vs Tr.8, Tr.18_A, Tr.18_B, Tr.21_A                 | NS      | Diploid vs      | Tr.8    | 0.0286  |
|                                                            |         |                 | Tr.18_A | NS      |
|                                                            |         |                 | Tr.18_B | 0.0286  |
| Fig. 7h WB STING                                           |         |                 |         |         |
| Diploid vs Tr.8, Tr.18_A, Tr.18_B, Tr.21_A                 | <0.0001 | Diploid vs      | Tr.8    | <0.0001 |
|                                                            |         |                 | Tr.18_A | <0.0001 |
|                                                            |         |                 | Tr.18_B | 0.0003  |
|                                                            |         |                 | Tr.21_A | <0.0001 |
| Fig. 7i WB p-STING                                         |         |                 |         |         |
| Diploid vs Tr.8, Tr.18_A, Tr.18_B, Tr.21_A                 | NS      | Diploid vs      | Tr.8    | 0.0022  |
|                                                            |         |                 | Tr.18_A | 0.0043  |
|                                                            |         |                 | Tr.18_B | 0.0043  |
|                                                            |         |                 | Tr.21_A | 0.0238  |
| Fig. 7k IF IRF3 nucl.                                      |         |                 |         |         |
| Diploid vs Tr.8, Tr.15, Tr.18_A, Tr.18_B, Tr.21_A, Tr.21_B | <0.0001 | Diploid vs      | Tr.8    | <0.0001 |
|                                                            |         |                 | Tr.15   | 0.0149  |
|                                                            |         |                 | Tr.18_A | 0.0009  |
|                                                            |         |                 | Tr.18_B | <0.0001 |
|                                                            |         |                 | Tr.21_A | 0.0206  |
|                                                            |         |                 | Tr.21_B | 0.0006  |

| Figure 8                                                   |         |                 |         |         |
|------------------------------------------------------------|---------|-----------------|---------|---------|
| ANOVA, p values                                            |         | t test, p value |         |         |
| Fig. 8b IF LC3+puncta                                      |         |                 |         |         |
| Diploid vs Tr.8, Tr.15, Tr.18_A, Tr.18_B, Tr.21_A, Tr.21_B | <0.0001 | Diploid vs      | Tr.8    | <0.0001 |
|                                                            |         |                 | Tr.15   | <0.0001 |
|                                                            |         |                 | Tr.18_A | <0.0001 |
|                                                            |         |                 | Tr.18_B | <0.0001 |
|                                                            |         |                 | Tr.21_A | <0.0001 |
|                                                            |         |                 | Tr.21_B | <0.0001 |
| Fig. 8d LysoTracker+ puncta                                |         |                 |         |         |
| Diploid vs Tr.8, Tr.18_A, Tr.18_B, Tr.21_A                 | <0.0001 | Diploid vs      | Tr.8    | <0.0001 |
|                                                            |         |                 | Tr.18_A | <0.0001 |
|                                                            |         |                 | Tr.18_B | <0.0001 |
|                                                            |         |                 | Tr.21_A | <0.0001 |
| Fig. 8f IF TFEB nucl.                                      |         |                 |         |         |
| Diploid vs Tr.8, Tr.15, Tr.18_A, Tr.18_B, Tr.21_A, Tr.21_B | <0.0001 | Diploid vs      | Tr.8    | NS      |
|                                                            |         |                 | Tr.15   | <0.0001 |
|                                                            |         |                 | Tr.18_A | 0.0023  |
|                                                            |         |                 | Tr.18_B | <0.0001 |
|                                                            |         |                 | Tr.21_A | <0.0001 |
|                                                            |         |                 | Tr.21_B | <0.0001 |

| Figure 8                                                 |                        |                 |
|----------------------------------------------------------|------------------------|-----------------|
|                                                          | Welch's test, p values | t test, p value |
| Fig. 8h – cGAS-CRISPR-KO vs CTRL-CRISPR – TFEB nucl. IF  |                        |                 |
| Diploid                                                  | NS                     | NS              |
| Trisomic                                                 | 0.0006                 | 0.0002          |
| Fig. 8j – STING-CRISPR-KO vs CTRL-CRISPR – TFEB nucl. IF |                        |                 |
| Diploid                                                  | NS                     | NS              |
| Trisomic                                                 | 0.0023                 | 0.0136          |

| Supplementary figure 5                                               |         |                 |             |        |
|----------------------------------------------------------------------|---------|-----------------|-------------|--------|
| ANOVA, p values                                                      |         | t test, p value |             |        |
| Suppl. Fig. 5a qRT-PCR <i>OAS3</i>                                   |         |                 |             |        |
| HCT116 vs HCT116+AraC,<br>Hte5_1, Htr18_1,<br>Htr21_3                | <0.0001 | HCT116<br>vs    | HCT116+AraC | 0.0040 |
|                                                                      |         |                 | Hte5_1      | 0.0159 |
|                                                                      |         |                 | Htr18_1     | 0.0028 |
|                                                                      |         |                 | Htr21_3     | 0.0033 |
| RPE1 vs RPE1+AraC,<br>Rtr3_1, Rtr8_1                                 | 0.0157  | RPE1 vs         | RPE1+AraC   | 0.0179 |
|                                                                      |         |                 | Rtr3_1      | 0.0436 |
|                                                                      |         |                 | Rtr8_1      | NS     |
| Suppl.Fig.5b qRT-PCR <i>IFITs</i>                                    |         |                 |             |        |
| <i>IFIT1</i> - HCT116 vs<br>HCT116+AraC, Hte5_1,<br>Htr18_1, Htr21_3 | NS      | HCT116<br>vs    | HCT116+AraC | 0.0286 |
|                                                                      |         |                 | Hte5_1      | 0.0286 |
|                                                                      |         |                 | Htr18_1     | 0.0159 |
|                                                                      |         |                 | Htr21_3     | 0.0095 |
| <i>IFIT3</i> - RPE1 vs<br>RPE1+AraC, Rtr3_1,<br>Rtr8_1               | NS      | RPE1 vs         | RPE1+AraC   | 0.0131 |
|                                                                      |         |                 | Rtr3_1      | 0.0179 |
|                                                                      |         |                 | Rtr8_1      | 0.0179 |

| Supplementary figure 5                                       |                        |                 |
|--------------------------------------------------------------|------------------------|-----------------|
|                                                              | Welch's test, p values | t test, p value |
| Suppl. Fig. 5f IF IRF3 nucl., transfected vs. nontransfected |                        |                 |
| HCT116                                                       | <0.0001                | <0.0001         |
| RPE1                                                         | <0.0001                | <0.0001         |

| Supplementary figure 6                    |         |                 |             |        |
|-------------------------------------------|---------|-----------------|-------------|--------|
| ANOVA, p values                           |         | t test, p value |             |        |
| Suppl. Fig. 6c qRT-PCR <i>OAS3</i>        |         |                 |             |        |
| HCT116 vs HCT116+AraC,<br>Hte5_14, Hte5_1 | 0.0001  | HCT116<br>vs    | HCT116+AraC | 0.0040 |
|                                           |         |                 | Hte5_14     | 0.0319 |
|                                           |         |                 | Hte5_1      | 0.0319 |
| RPE1 vs RPE1+AraC,<br>Rtr21_2             | NS      | RPE1 vs         | RPE1+AraC   | 0.0179 |
|                                           |         |                 | Rtr21_2     | 0.0151 |
| Suppl. Fig. 6d qRT-PCR <i>IFIT1</i>       |         |                 |             |        |
| HCT116 vs HCT116+AraC,<br>Hte5_14, Hte5_1 | 0.0289  | HCT116<br>vs    | HCT116+AraC | 0.0286 |
|                                           |         |                 | Hte5_14     | 0.0571 |
|                                           |         |                 | Hte5_1      | 0.0571 |
| RPE1 vs RPE1+AraC,<br>Rtr21_2             | 0.0048  | RPE1 vs         | RPE1+AraC   | 0.0057 |
|                                           |         |                 | Rtr21_2     | 0.0057 |
| Suppl. Fig. 6e qRT-PCR <i>IFIT3</i>       |         |                 |             |        |
| HCT116 vs HCT116+AraC,<br>Hte5_14, Hte5_1 | 0.0030  | HCT116<br>vs    | HCT116+AraC | 0.0319 |
|                                           |         |                 | Hte5_14     | 0.0319 |
|                                           |         |                 | Hte5_1      | 0.0319 |
| RPE1 vs RPE1+AraC,<br>Rtr21_2             | <0.0001 | RPE1 vs         | RPE1+AraC   | 0.0131 |
|                                           |         |                 | Rtr21_2     | 0.0265 |

| Supplementary figure 8                           |         |                 |         |         |
|--------------------------------------------------|---------|-----------------|---------|---------|
| ANOVA, p values                                  |         | t test, p value |         |         |
| Fig. 8e IF dsDNA and H3 + puncta, %              |         |                 |         |         |
| Diploid vs Tr.8,<br>Tr.18_A, Tr.18_B,<br>Tr.21_A | <0.0001 | Diploid vs      | Tr.8    | <0.0001 |
|                                                  |         |                 | Tr.18_A | <0.0001 |
|                                                  |         |                 | Tr.18_B | <0.0001 |
|                                                  |         |                 | Tr.21_A | <0.0001 |
| Fig. 8g IF dsDNA and TFAM + puncta, %            |         |                 |         |         |
| Diploid vs Tr.8,<br>Tr.18_A, Tr.18_B,<br>Tr.21_A | <0.0001 | Diploid vs      | Tr.8    | <0.0001 |
|                                                  |         |                 | Tr.18_A | <0.0001 |
|                                                  |         |                 | Tr.18_B | <0.0001 |
|                                                  |         |                 | Tr.21_A | <0.0001 |

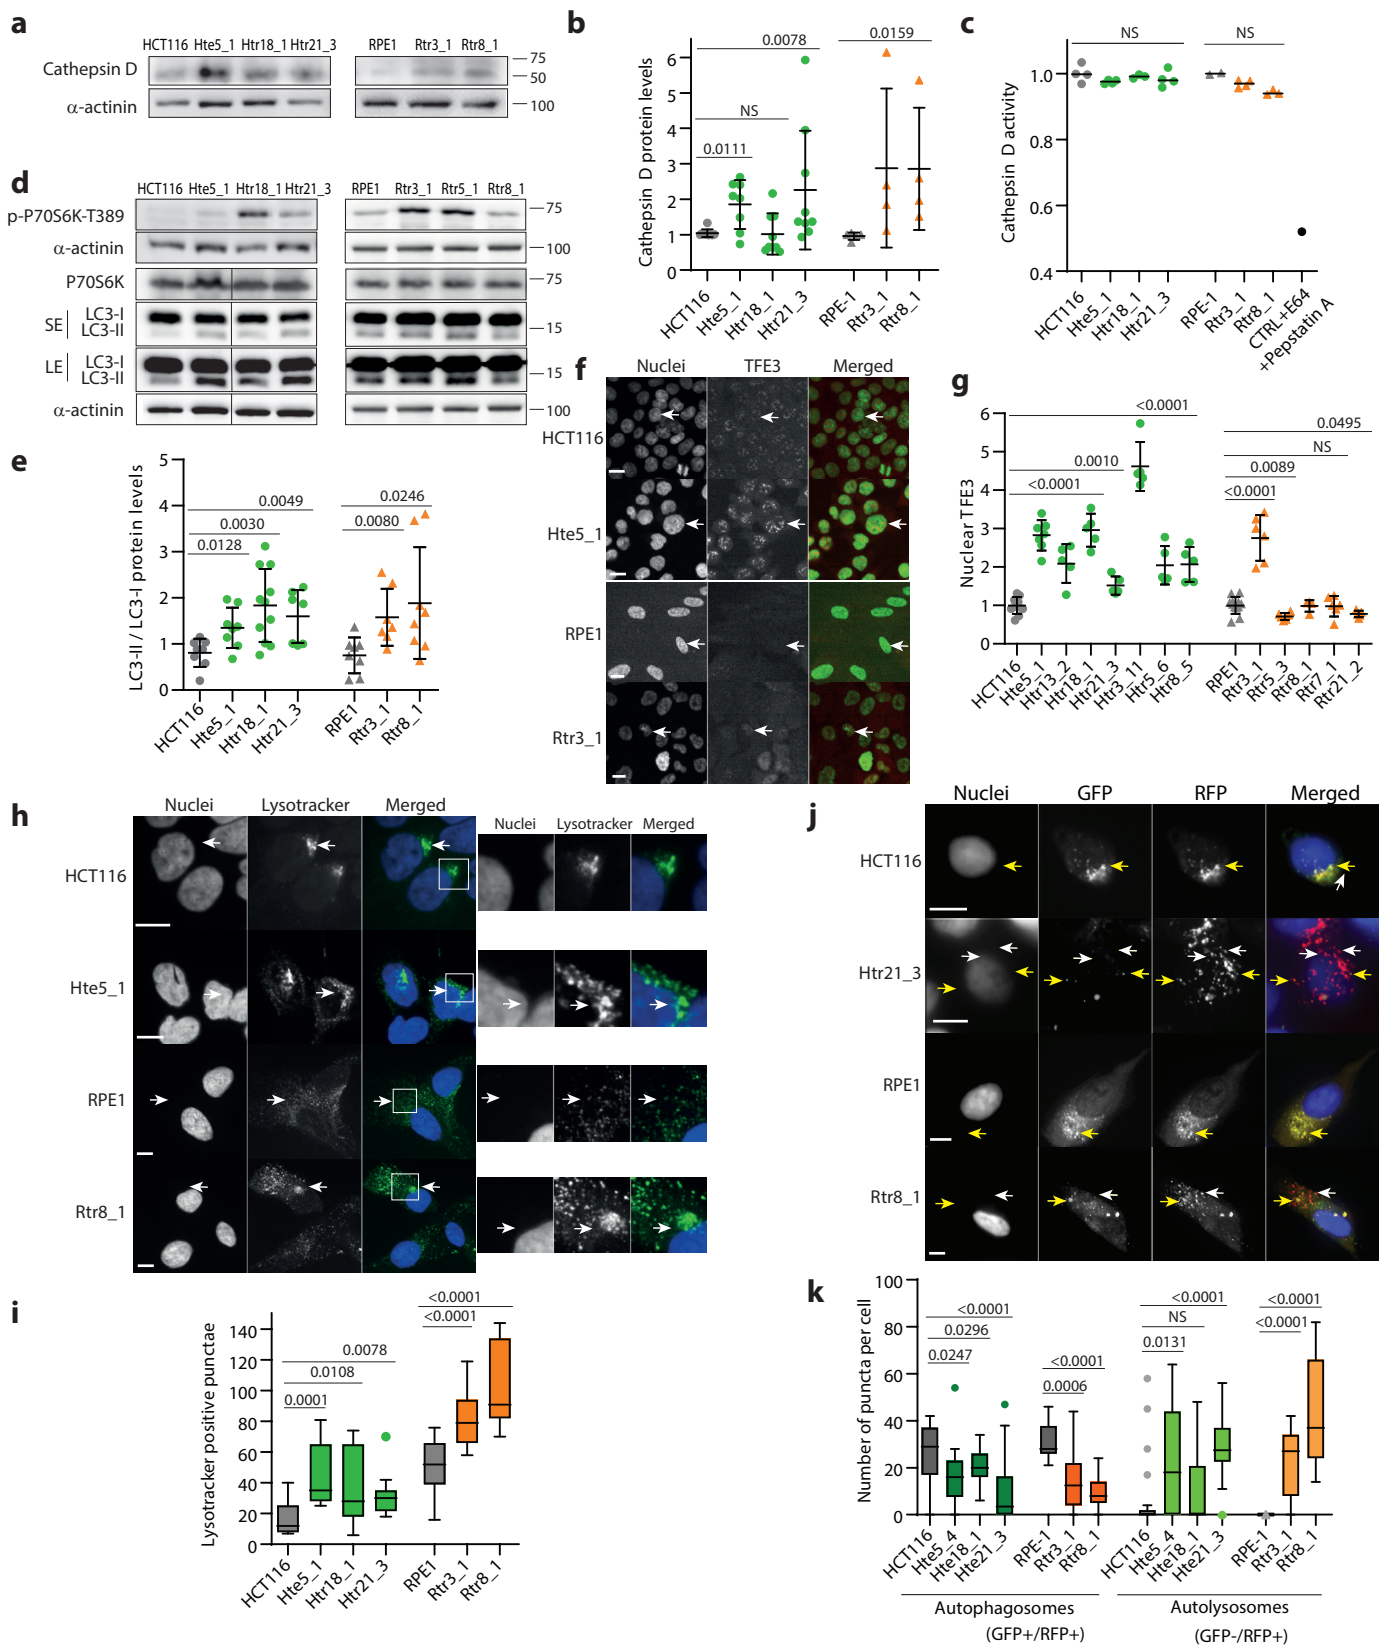

Supplementary Figure 1

**Characterisation of autophagy in trisomic cells.** Immunoblotting of Cathepsin D protein (a) and its quantification relative to the loading control  $\alpha$ -actinin (b),  $n=4-9$ . c) Activity of Cathepsin D,  $n=2-4$ . Mann-Whitney test was applied for the statistical analysis of the data on plots b) and c). d) Immunoblotting of P70S6K and its phosphorylated form, and of LC3.  $\alpha$ -actinin serves as a loading control. SE - short exposure time, LE - long exposure time. e) Quantification of the LC3-II/LC3-I ratio,  $n=7-11$ . Imaging and quantification of nuclear TFE3 (f, g). The immunofluorescence data were analysed as in Fig. 1e to quantify the delta MFI. In average at least 1000 cells for HCT116- and 500 cells for RPE1-derived cell lines were analyzed, means of individual experiments are shown,  $n=4-12$ . Lysosomes were visualized by lysotracker (h) and positive puncta were manually quantified from at least 15 cells in each cell line (i),  $n=13-15$ . Imaging (j) and quantification (k) of yellow GFP+/mRFP+ autophagosomes (yellow arrows) and mRFP+ autolysosomes (white arrows) in cells transfected with LC3-GFP-mRFP construct. At least 20 cells per each condition were analyzed for puncta quantification, number of measurements for statistics  $n=10-22$ . Unpaired t test was applied for statistical analysis, unless other is specified. Individual measurements, mean values and standard deviation are shown. Scale bar in all images 10  $\mu$ m

. Statistical evaluation are in Supplementary table 4, source data

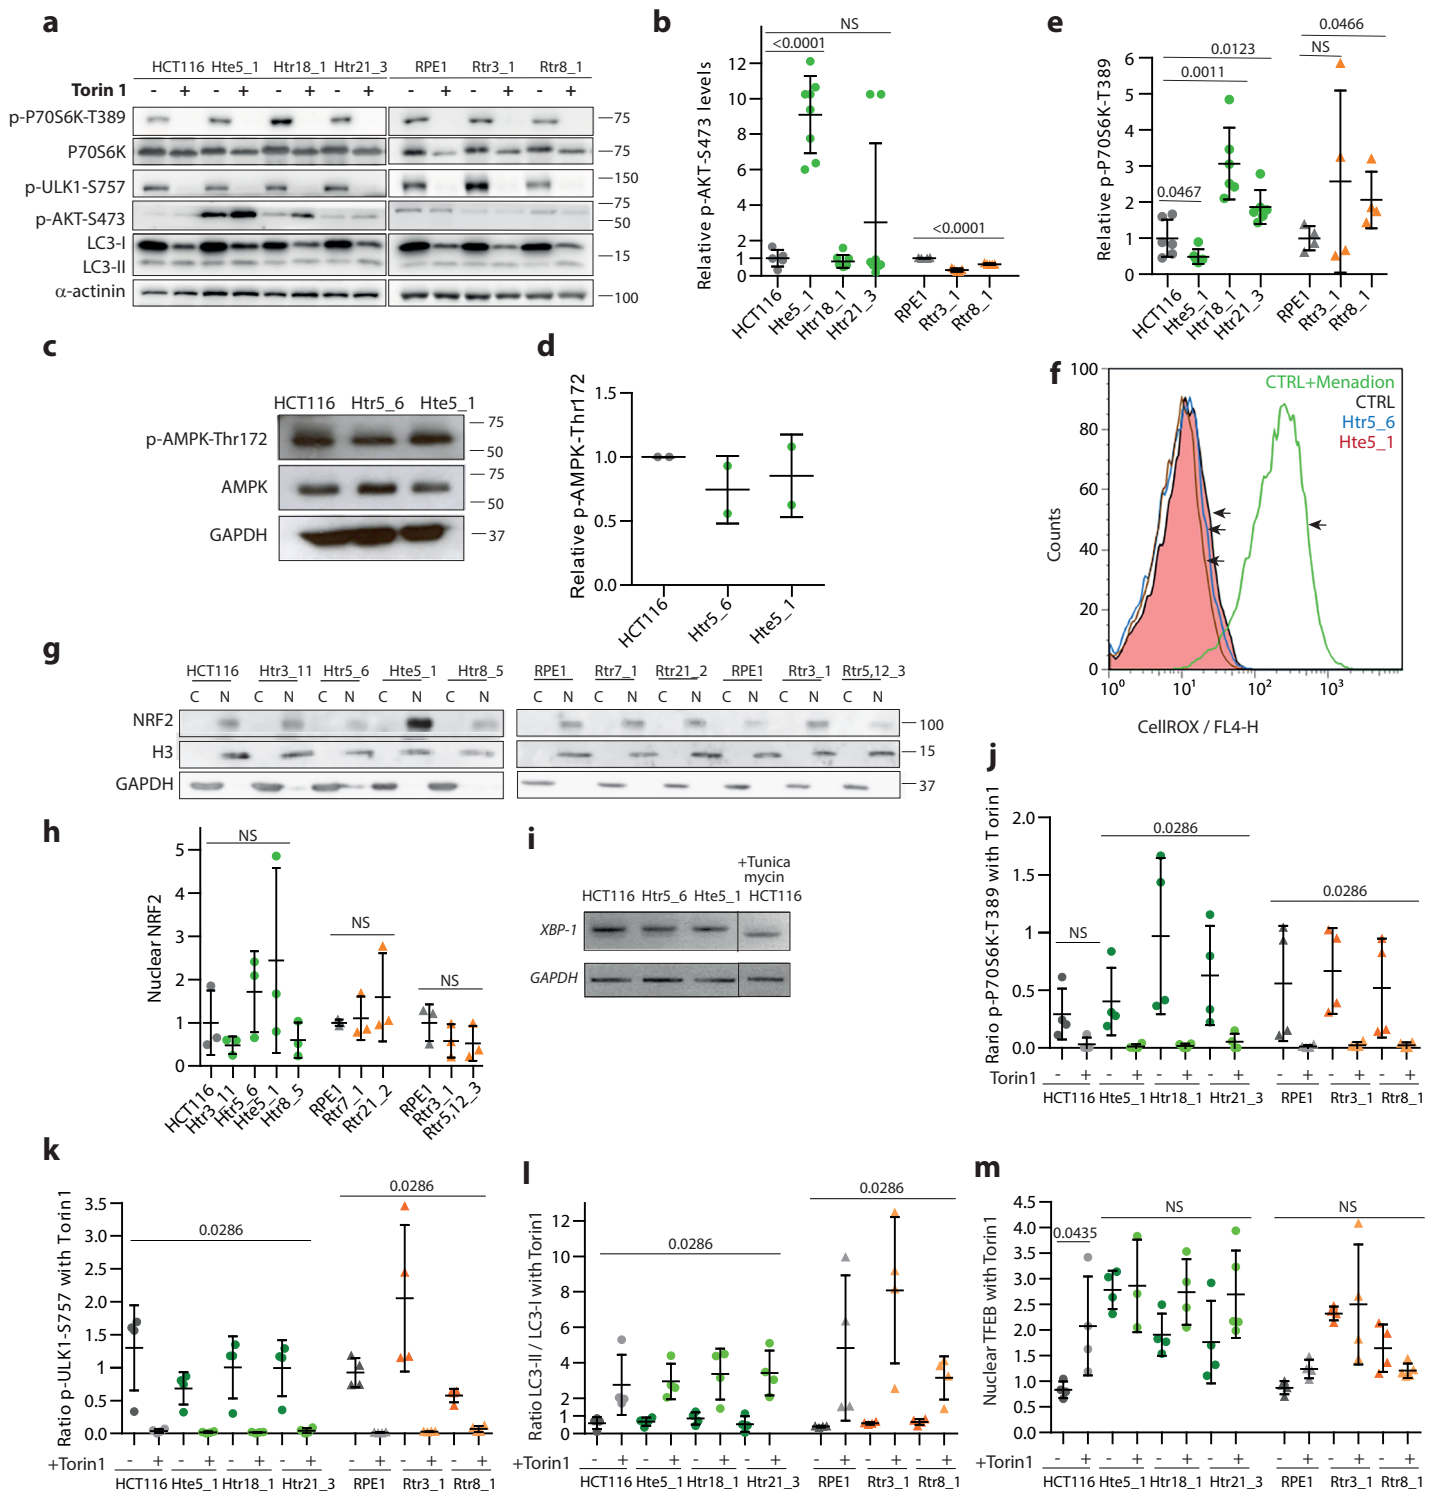

## Supplementary Figure 2

**Regulation of autophagy in trisomic cells.** a) Immunoblotting of mTOR downstream phosphorylation targets p-P70S6K-T389, p-AKT-S473, p-ULK1-S757, and LC3 upon treatment with Torin 1 (2  $\mu$ M, overnight incubation).  $\alpha$ -actinin serves as a loading control. Quantification of the relative phosphorylated p-Akt1-S473 (b, n=4-8) and p-P70S6K-T389 (e, n=4-6). For graphs b) and e) unpaired t test was used for statistical analysis. c) Immunoblotting and d) quantification of the relative phospho-AMPK-Thr172 levels. f) Flow cytometry evaluation of the CellROX signal. g) Immunoblotting and h) quantification of nuclear NRF2 levels in fractionated cell lysates, n=3. i) Electrophoresis of the XBP1 cleavage, HCT116 treated with Tunicamycin was used as a control for unfolded protein response. Quantification of the phosphorylation of p-P70S6K-T389 (j, n=4) and p-ULK1-S757 (k, n=4), inhibited upon treatment with Torin 1. Data were normalized to the corresponding DMSO control for every cell line. l) Quantification of LC3-II/LC3-I ratio upregulation upon inhibition of mTORC1 with Torin 1 (2  $\mu$ M, overnight incubation), n=4. m) Quantification of nuclear TFEB localization upon inhibition of mTORC1 with Torin 1 (2  $\mu$ M, overnight incubation), n=3-5. The immunofluorescence data were analysed as in Fig. 1c in order to quantify the delta MFI relative to control. The sample analysis was performed relative to corresponding DMSO control. Mann-Whitney test was applied for all graphs, unless other wisepesified. Individual measurements, mean values and standard deviation are shown. Statistical evaluation and source data are summarized in Supplementary table 4 and Supplementary Data 6, respectively.

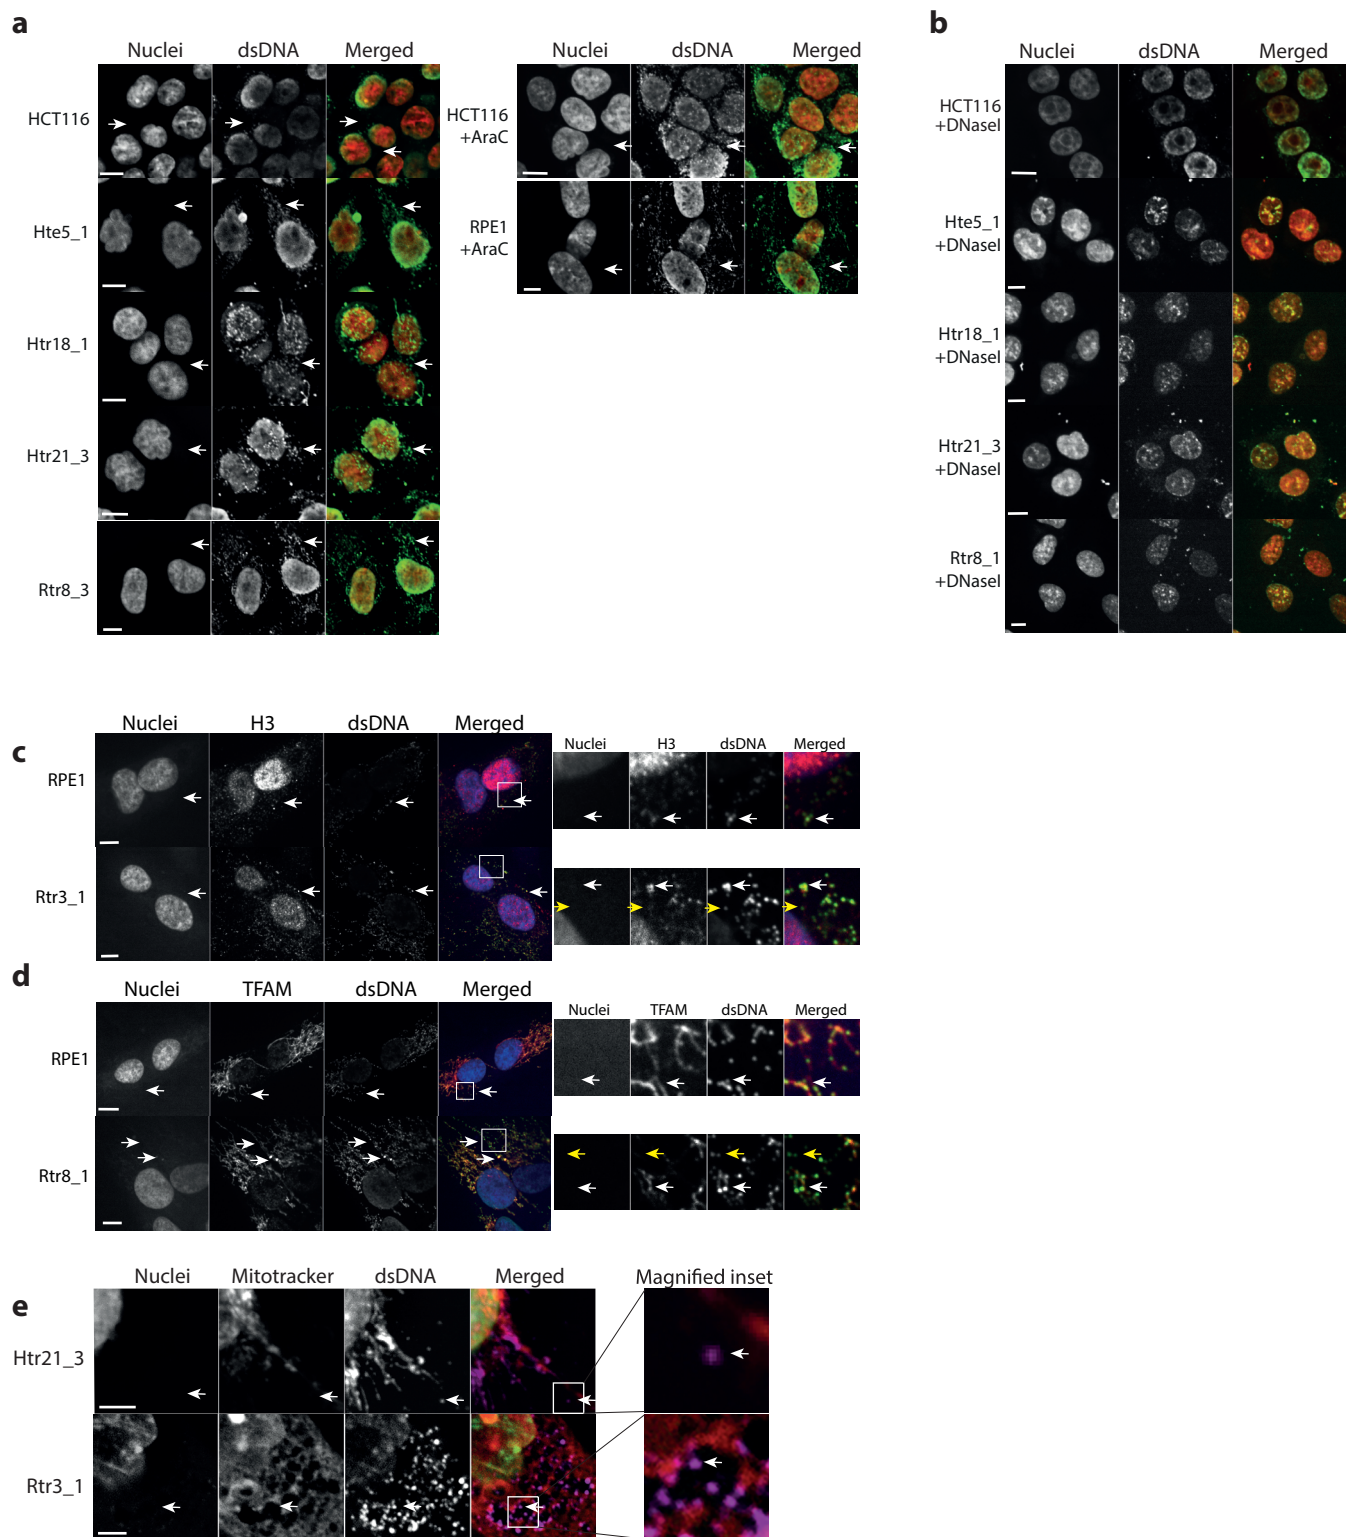

Supplementary Figure 3

**dsDNA presence in the cytoplasm of trisomic cells.** Microscopy images of cytoplasmic dsDNA (white arrows) in trisomic and control cells treated with AraC, as a positive control, (a) and DNase I as a negative control (b). c) Images of cytoplasmic dsDNA and mitotracker. White points on colocalization of dsDNA and mitotracker in cytoplasm of the cell. Imaging of cytoplasmic dsDNA colocalized with genomic H3 (d) and mitochondrial TFAM (e). White arrows indicate dsDNA puncta that colocalize with H3 (d) or TFAM (e) and yellow arrows that didn't. Scale bar in all images 10  $\mu$ m.

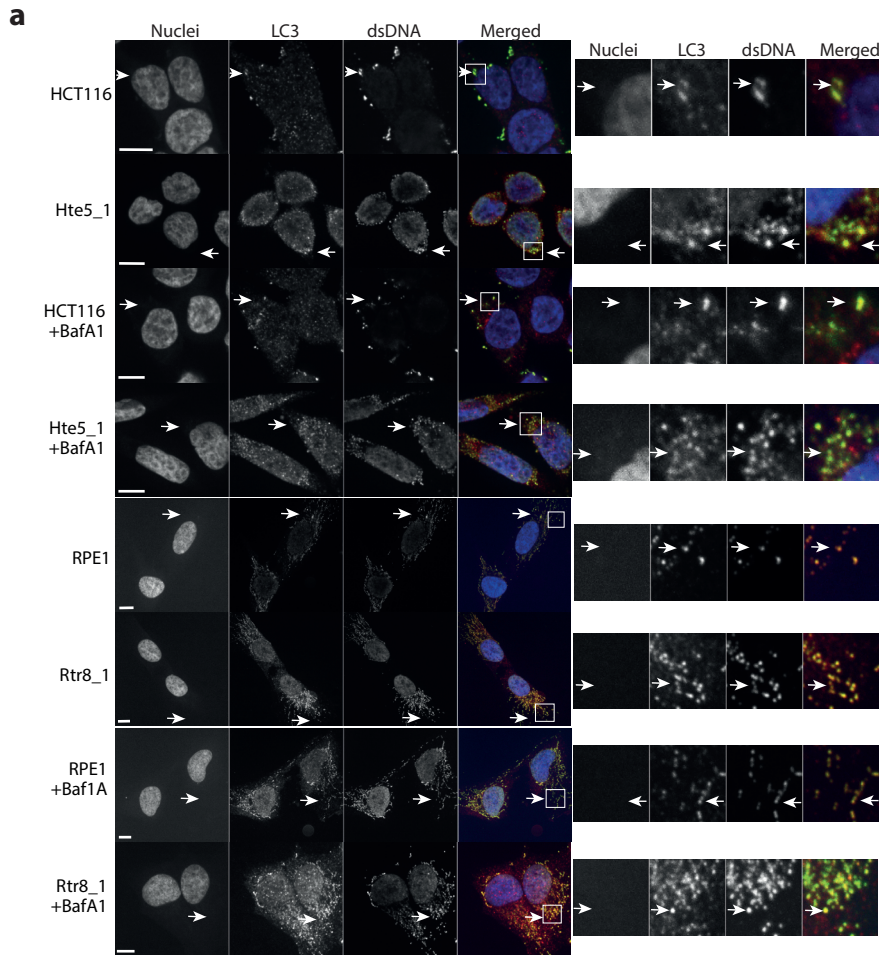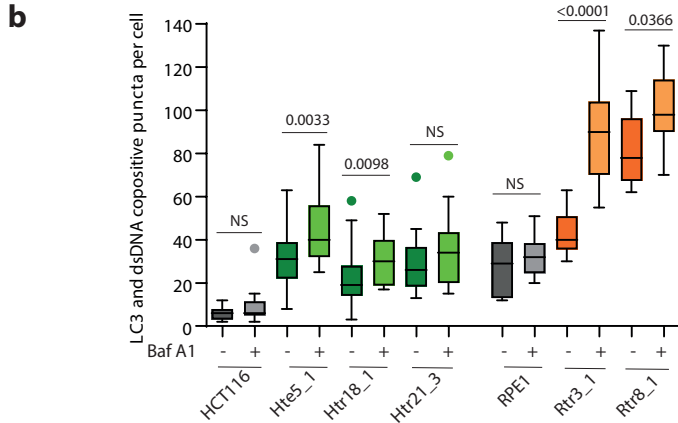

#### Supplementary Figure 4

**dsDNA accumulation in cytoplasm upon autophagy inhibition in trisomic cells.** a). Immunofluorescence images of cytoplasmic dsDNA colocalizing with LC3-positive puncta in the presence of Bafilomycin A1 (4 hours). White arrows point on colocalization of dsDNA and LC3. b) Quantification of the numbers of dsDNA with LC3 copositive puncta per cell. At least n=20 cells for HCT116 and n=10 cells for RPE1 cell lines were analyzed per each condition. Unpaired t test was applied for statistical analysis. Individual measurements, mean values and standard deviations are shown on the plot. Scale bar in all images 10 μm. Statistical evaluation and source data are summarized in Supplementary table 4 and Supplementary Data 6, respectively.



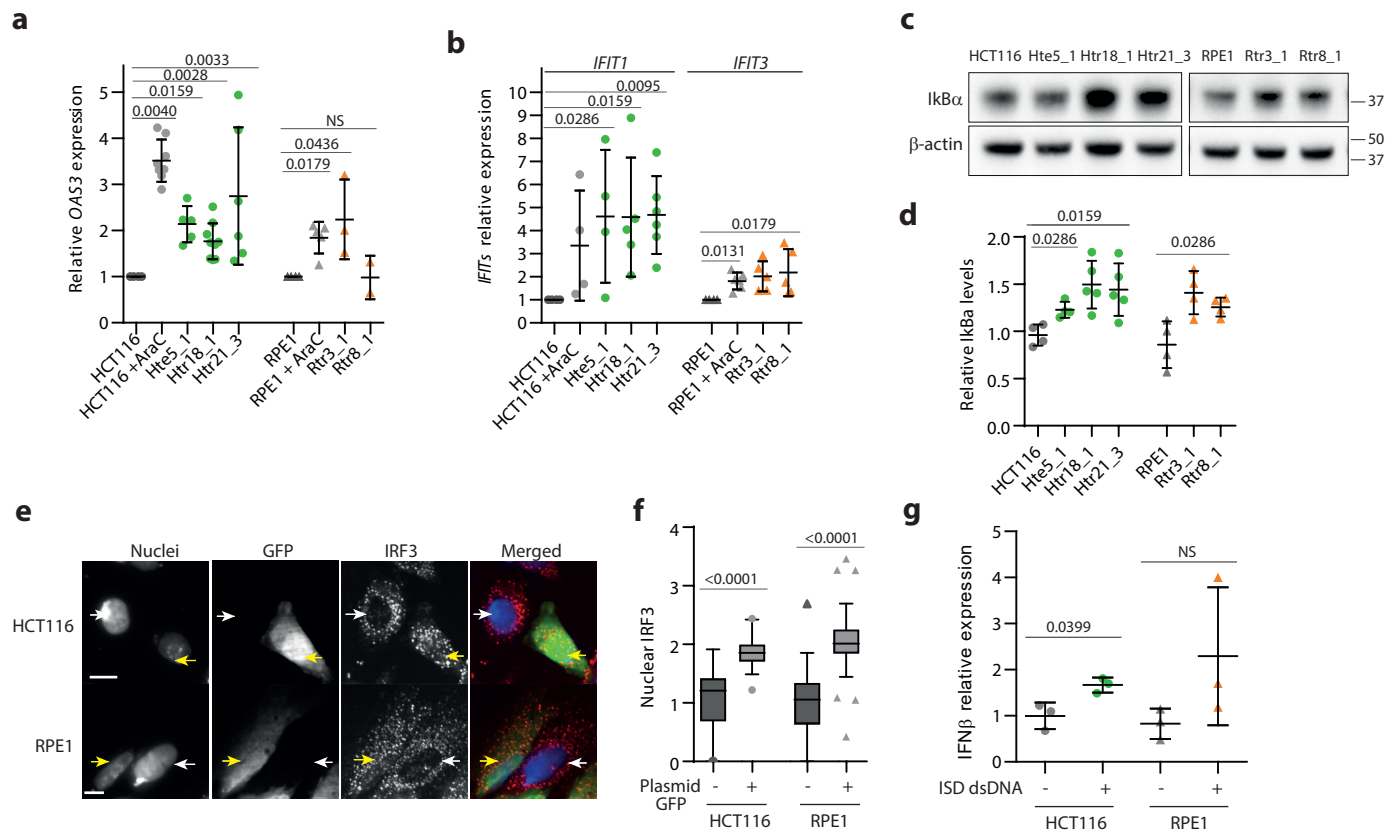

## Supplementary Figure 5

**Activation of the innate immune pathway in trisomic cells.** a), b) Quantification of the relative expression of *OAS3*, *IFIT1* and *IFIT3* evaluated by qRT-PCR. Treatment with AraC was used as a positive control, n=2-9. Immunoblot (c) and relative quantification (d) of IκBα protein, n=4-5. Mann-Whitney test was applied for statistical analysis. Individual measurements, mean values and standard deviations are shown. e) IRF3 localization in cells transfected with a GFP-encoding plasmid. The GFP positive cells show IRF3-positive nuclei (yellow arrows). f) Quantification of nuclear IRF3 intensity in cells from figure (e). At least n=30 cells were analyzed for each condition. Data were normalized to the signal of the control untransfected cells, with IRF3-negative nuclei (white arrows). Unpaired t test was used to analyzed data on the graph f). g) Quantification of *IFNβ* relative expression after ISD DNA oligo transfection, n=3. Two tailed unpaired t test was performed for statistical analysis. Scale bar in all images 10 μm. Statistical evaluation and source data are summarized in Supplementary table 4 and Supplementary Data 6.

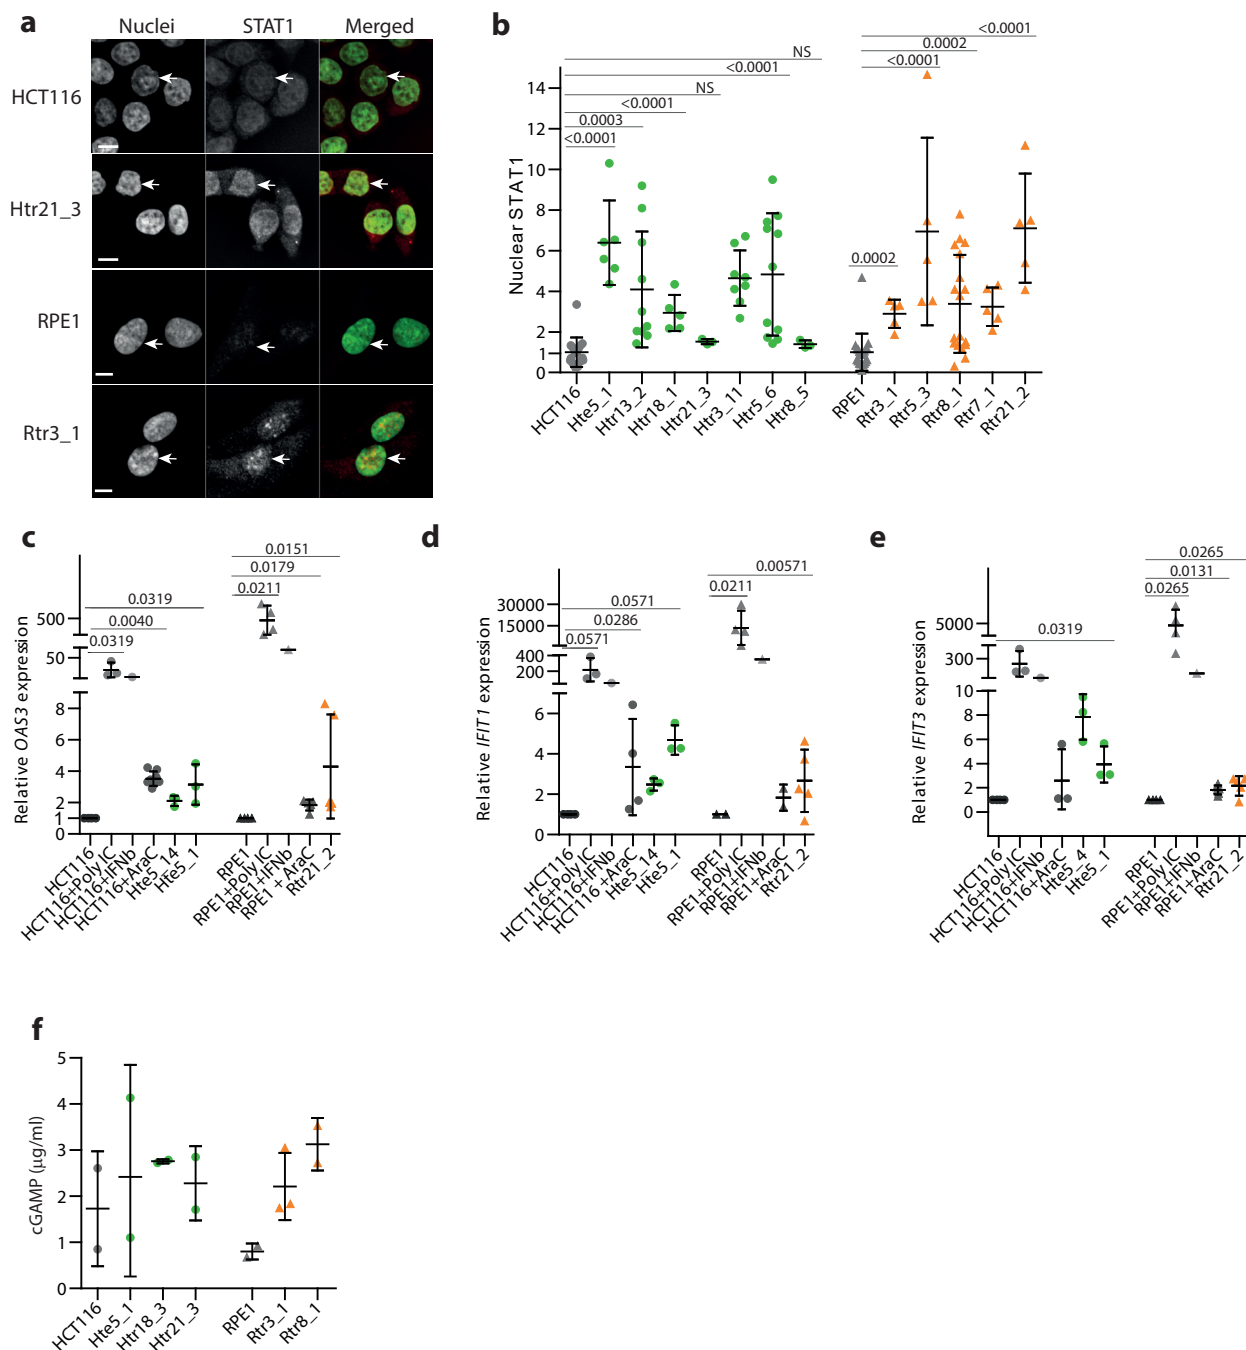

Supplementary Figure 6

**Transcriptional activation of the innate immune pathway in trisomic cells** a) Representative images of STAT1 nuclear localization in diploid vs. trisomic cells. b) Quantification of the nuclear STAT1 levels. In average 2000 cells for HCT116 and 1000 cells for RPE1 were analyzed for each cell line. The number of measurements  $n=3-21$  for each cell lines. Unpaired t test was used for statistical analysis. c-e) Quantification of the relative expression of *OAS3*, *IFIT1* and *IFIT3* evaluated by qRT-PCR. AraC treatment was used as a positive control. The number of measurements  $n=3-8$  for statistical analysis with Mann-Whitney. h) The levels of cGAMP measured by ELISA. Individual measurements, mean values and standard deviations are shown. Scale bar in all images 10  $\mu$ m. Statistical evaluation is summarized in Supplementary table 4, source data in Supplementary Data 6.

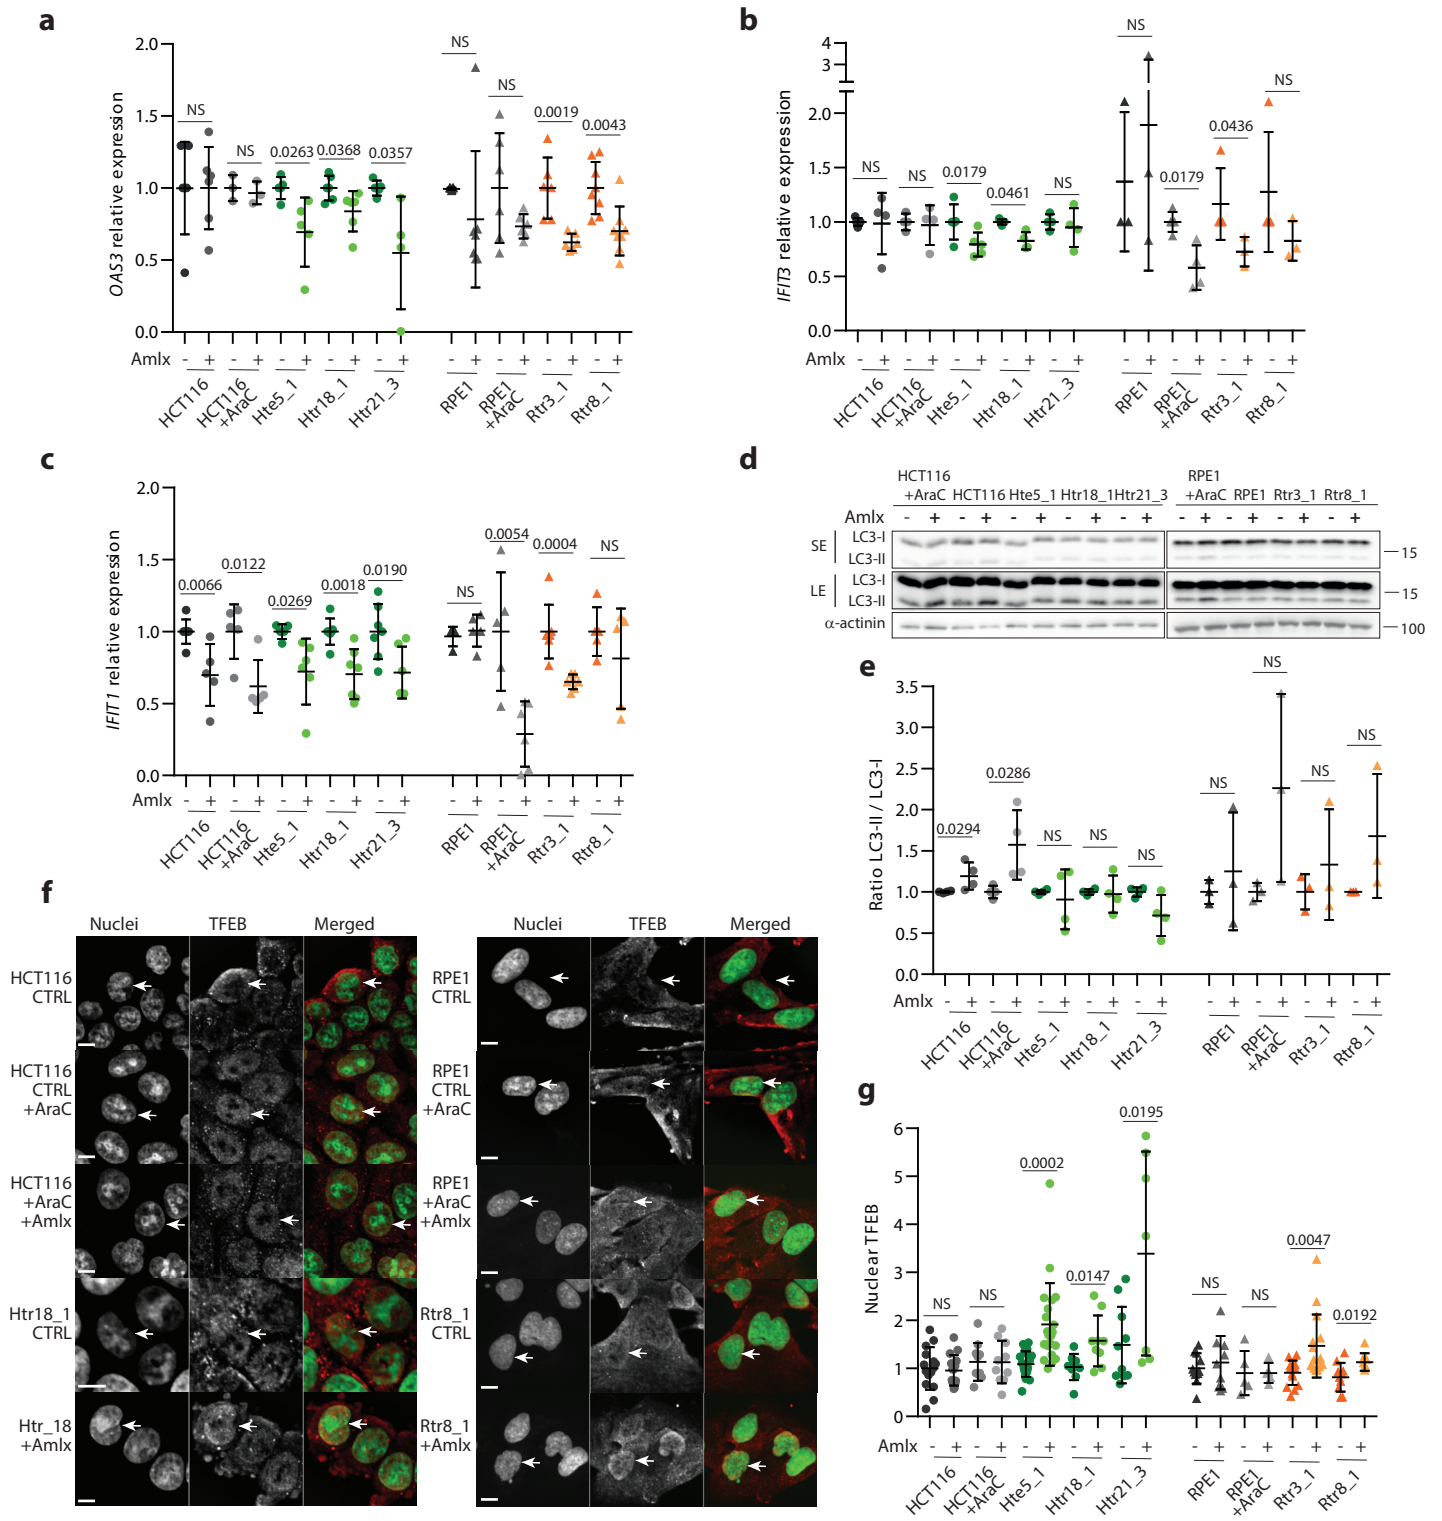

Supplementary Figure 7

**Activation of the innate immune response, but not autophagy, depends on TBK1 in constitutive trisomic cells.**

a-c) Quantification of relative qRT-PCR of selected IRF3 targets and ISGs after Amlexanox treatment. The data were normalized to the corresponding DMSO controls for each cell line, n=3-7. d) Immunoblotting of LC3-I and LC3-II in diploid and aneuploid cells upon TBK1 inhibition with Amlexanox (Amlx).  $\alpha$ -actinin was used as loading control. SE-short exposure, LE - long exposure. e) Quantification of the normalized LC3-II/LC3-I ratio upon TBK1 inhibition with Amlexanox, n=3-4. All samples were normalized to the corresponding DMSO control of every cell line. f) Examples of immunofluorescent images of TFEB localization in cells treated with Amlexanox. White arrows indicate nuclei that are more abundant with TFEB protein with Amlexanox in trisomic cells. g) Quantification of nuclear TFEB signal. In average 1400 cells for HCT116 and 300 cells for RPE1 were analyzed per each cell lines. The number of measurements n=5-9 were performed for statistical analysis with Mann-Whitney test for the graphs b and e. For graphs a, c and g unpaired t test was used to analyze data. Individual measurements, mean and p-values and standard deviations are shown in the plots. Scale bar 10  $\mu$ m. Statistical evaluation and source data are summarized in Supplementary table 4 and Supplementar Data 6, respectively.

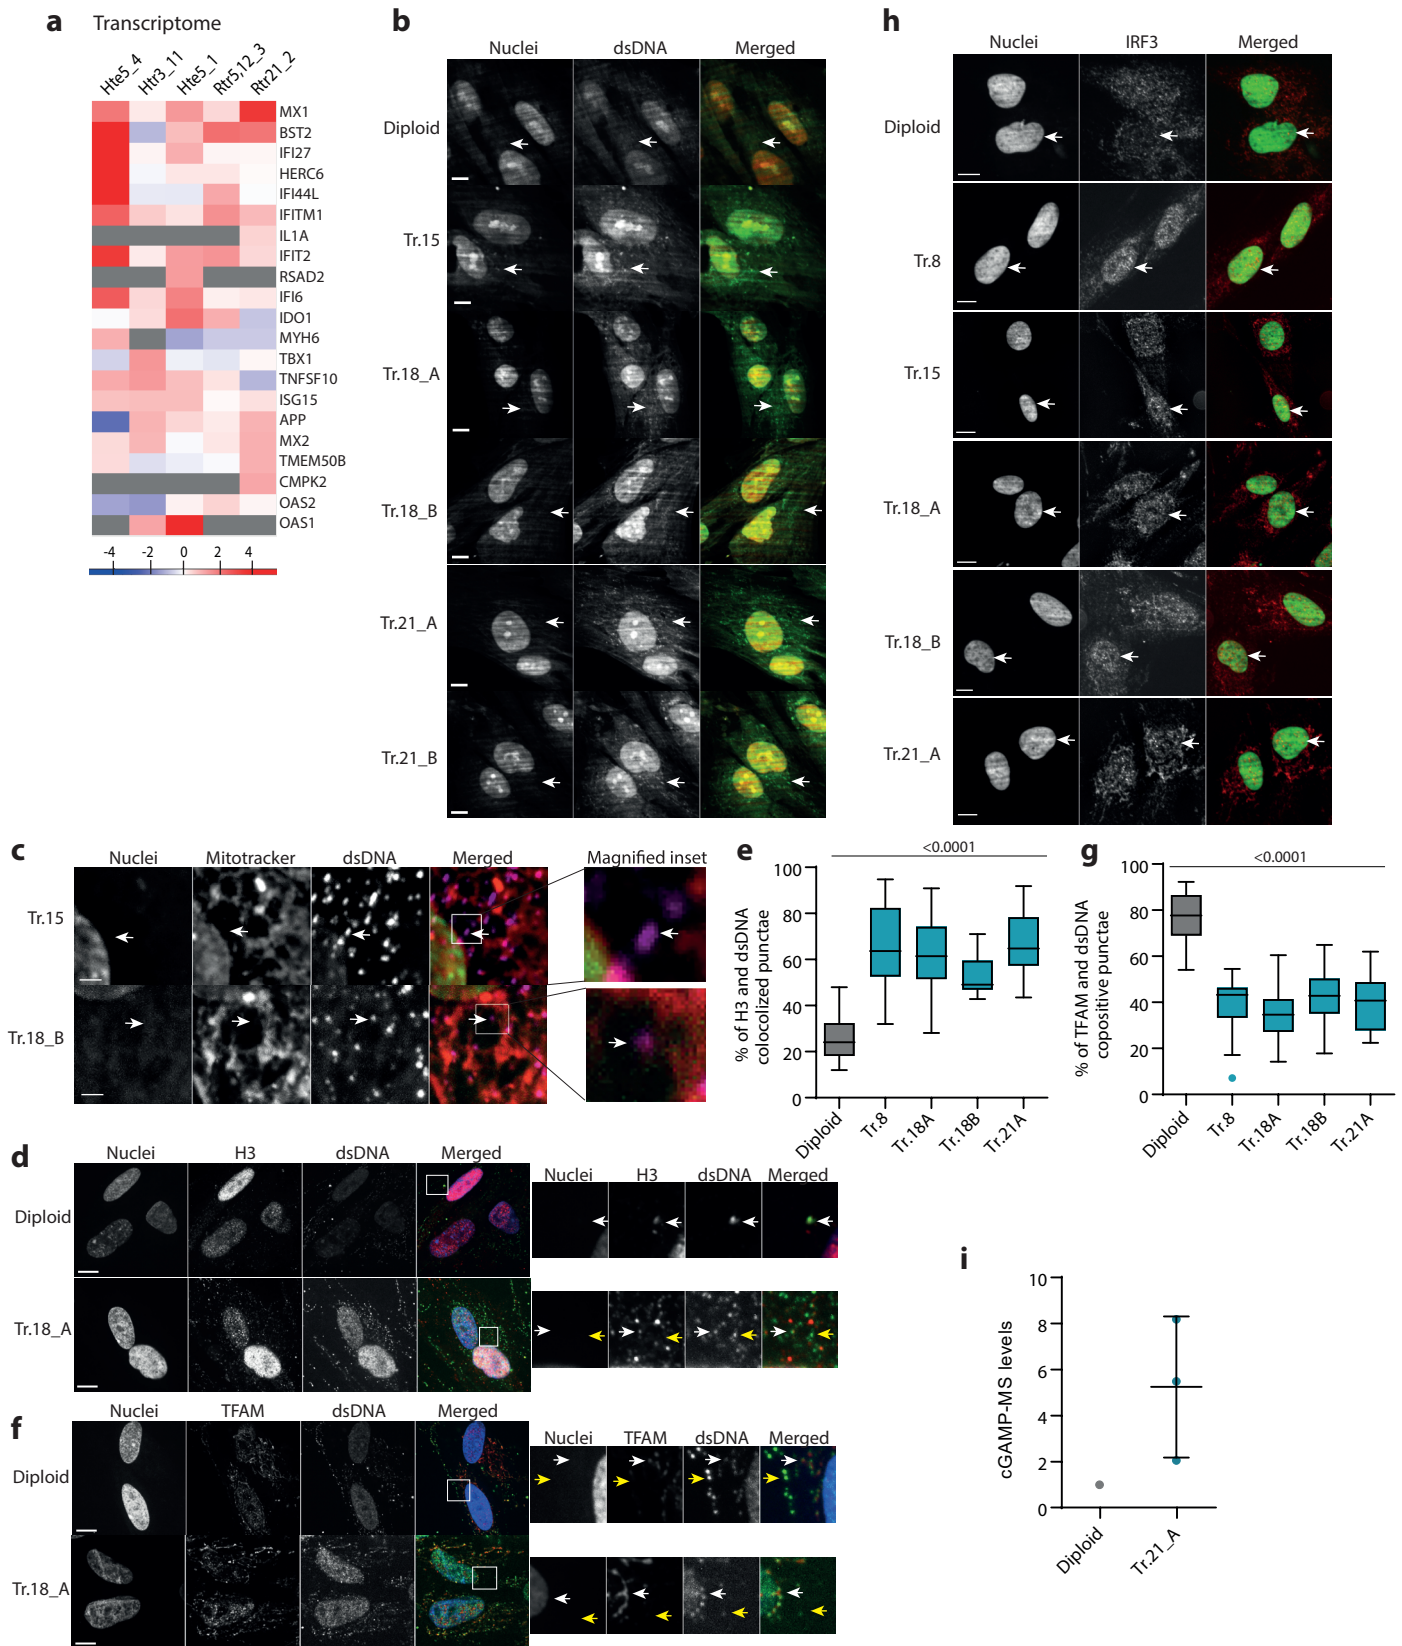

Supplementary Figure 8

**Innate immune response in trisomic primary human fibroblasts.** a) Heat map based on our transcriptome data shows the expression levels of the inflammatory gene set known to be activated in Down syndrome patients (from Sullivan et al, 2016) in model trisomic cells. b) Representative immunofluorescence images of dsDNA in cytoplasm (white arrows) in primary human fibroblast. c) Representative immunofluorescence images of mitochondria and dsDNA in primary human fibroblasts. White arrows point to colocalization of dsDNA and mitotracker. Immunofluorescent images of dsDNA and H3 (d) or TFAM (f). White arrows point to dsDNA colocalized with H3 (d) or TFAM (f), yellow arrows indicate absence of colocalization of dsDNA with these markers. Quantification of percentages of dsDNA colocalized with H3 (e) and TFAM (g). In average n=30 cells were analyzed per each cell line. Unpaired t test was applied for data analysis. h) Examples of IF IRF3 images. i) cGAMP levels measured by mass spectrometry. Individual measurements, mean values and standard deviation are shown on the graphs. Scale bar 10  $\mu$ m. Statistical evaluation and source data are summarized in Supplementary table 4 and Supplementary Data 6.

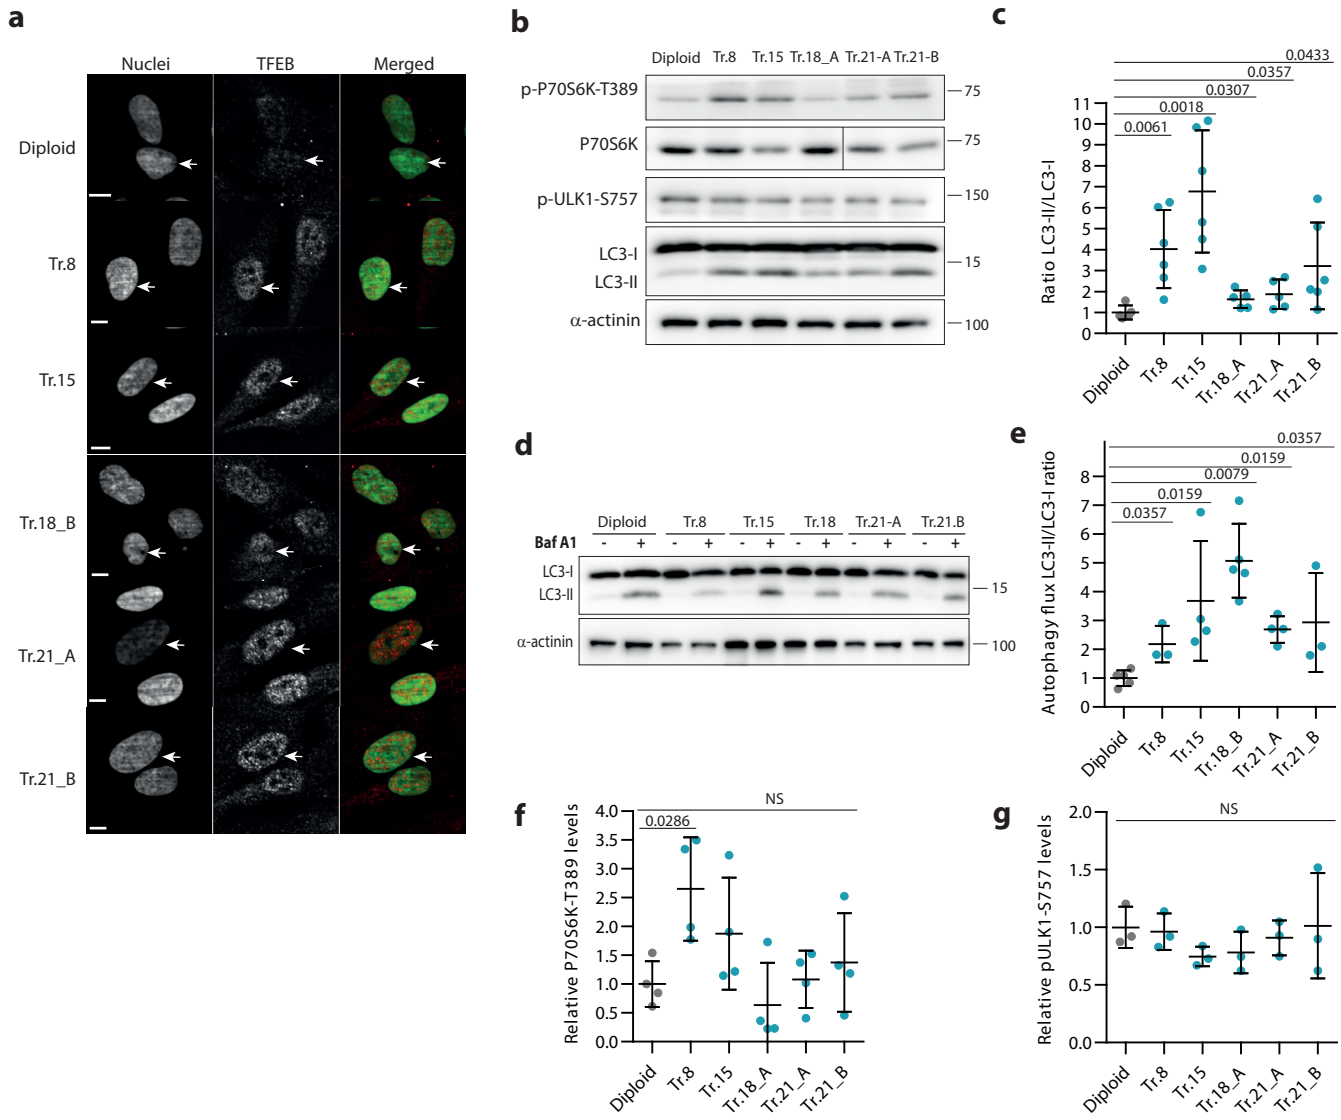

Supplementary Figure 9

**Autophagy activity in trisomic primary human fibroblasts** a) Localization of TFEB in primary embryonic fibroblasts. White arrows point to the nuclei. Scale bar 10  $\mu$ m. b) Immunoblotting of mTORC1 downstream phosphorylation targets p-P70S6K-T389, p-ULK1-S757 and LC3 in primary fibroblasts.  $\alpha$ -actinin was used as loading control. Quantification of the LC3-II/LC3-I ratio (c, n=5-6) and relative protein levels of p-P70S6K-T389 (f, n=4), p-ULK1-S757 (g, n=3) in primary fibroblast. Data were normalized to diploid control samples. d) Immunoblotting of LC3 upon Bafilomycin 1A treatment (100 nM, 4 hours incubation) in primary fibroblasts.  $\alpha$ -actinin was used as loading control. e) Quantification of the LC3II/LC3-I ratio in primary fibroblasts treated with Bafilomycin 1A to estimate the autophagic flux, n=3-5. The LC3-II/LC3-I ratio was calculated similar as in c and normalized to control. Mann-Whitney test was applied for statistical analysis of all graphs, only graph c was analyzed using unpaired t-test. Individual measurements, mean values and standard deviations are shown on the graphs. Statistical evaluation and source data are summarized in Supplementary table 4 and Supplementary Data 6, respectively.
