# Supplementary material for: Genotoxic stress in constitutive trisomies induces autophagy and the innate immune response via the cGAS-STING pathway
Source: PubMed Central journal article supplement (PMC8253785; doi:10.1038/s42003-021-02278-9), 2021-07-02
Supplement: 42003_2021_2278_MOESM2_ESM.pdf [file 42003_2021_2278_MOESM2_ESM.pdf]

## **Description of Additional Supplementary Files**

**File name:** Supplementary Data 1

**Description:** Expression of TFEB-dependent factors in aneuploid cells.

**File Name:** Supplementary Data 2

**Description:** Expression of IRF3 and NFkB-dependent factors in aneuploid cells.

**File Name:** Supplementary Data 3

**Description:** Expression of NFkB targets evaluated by quantitative rtPCR.

**File Name:** Supplementary Data 4

**Description:** Expression of inflammation markers in aneuploid cells.

**File Name:** Supplementary Data 5

**Description:** Source data for all main figures.

**File Name:** Supplementary Data 6

**Description:** Source data for all supplementary figures.
